# Supplementary material
Source: PubMed Central journal article supplement (PMC8559724)
Supplement: NIHMS1684837-supplement-supinfo.pdf [file NIHMS1684837-supplement-supinfo.pdf]

Supplemental table 1: Association between billed ACP and location of death

|                                 | <b>OR (95% CI)</b> | <b>P value</b> |
|---------------------------------|--------------------|----------------|
| <b>ACP</b>                      |                    |                |
| No billed CP                    | Ref                | <0.0001        |
| Had billed ACP                  | 0.83 (0.79, 0.88)  |                |
| <b>Sex</b>                      |                    |                |
| Male                            | Ref                | <0.0001        |
| Female                          | 1.03 (0.99, 1.06)  |                |
| <b>Age Categories</b>           |                    |                |
| 65-69 years                     | Ref                | <0.0001        |
| 70-74 years                     | 0.88 (0.83, 0.93)  |                |
| 75-79 years                     | 0.81 (0.77, 0.86)  |                |
| 80-84 years                     | 0.65 (0.64, 0.72)  |                |
| 85-89 years                     | 0.57 (0.54, 0.60)  |                |
| 90-94 years                     | 0.47 (0.44, 0.50)  |                |
| >=95                            | 0.38 (0.35-0.41)   |                |
| <b>Race/Ethnicity</b>           |                    |                |
| Non-Hispanic White              | Ref                | <0.0001        |
| Non-Hispanic Black              | 1.32 (1.25, 1.38)  |                |
| Hispanic                        | 1.67 (1.49, 1.86)  |                |
| Asian                           | 2.37 (2.11, 2.65)  |                |
| Other                           | 1.56 (1.40, 1.74)  |                |
| Unknown                         | 1.33 (1.05, 1.69)  |                |
| <b>Medicare spending by HRR</b> |                    |                |
| Low                             | Ref                | <0.0001        |
| Medium                          | 1.00 (0.96-1.05)   |                |
| High                            | 1.17 (1.12, 1.23)  |                |
| <b>Charlson index</b>           |                    |                |
| 0                               | Ref                | <0.0001        |
| 1                               | 2.77 (2.36, 3.26)  |                |
| 2                               | 4.28 (3.67, 4.99)  |                |
| 3                               | 5.77 (4.95, 6.72)  |                |
| 4                               | 7.42 (6.37, 8.63)  |                |
| 5 or more                       | 9.00 (7.75, 10.46) |                |
| <b>Dual Eligibility Status</b>  |                    |                |
| No                              | Ref                | <0.0001        |
| Yes                             | 0.84 (0.81, 0.87)  |                |

Supplemental table 2: Association between billed ACP and hospital admission in last 30 days

|                                 | <b>OR (95% CI)</b>   | <b>P value</b> |
|---------------------------------|----------------------|----------------|
| <b>ACP</b>                      |                      |                |
| No billed CP                    | Ref                  | <0.0001        |
| Had billed ACP                  | 0.82 (0.78, 0.86)    |                |
| <b>Sex</b>                      |                      |                |
| Male                            | Ref                  | <0.0001        |
| Female                          | 1.05 (1.03, 1.08)    |                |
| <b>Age Categories</b>           |                      |                |
| 65-69 years                     | Ref                  | <0.0001        |
| 70-74 years                     | 0.88 (0.83, 0.94)    |                |
| 75-79 years                     | 0.86 (0.81, 0.91)    |                |
| 80-84 years                     | 0.77 (0.73, 0.81)    |                |
| 85-89 years                     | 0.70 (0.66, 0.74)    |                |
| 90-94 years                     | 0.61 (0.58, 0.65)    |                |
| >=95                            | 0.52 (0.48, 0.55)    |                |
| <b>Race/Ethnicity</b>           |                      |                |
| Non-Hispanic White              | Ref                  | <0.0001        |
| Non-Hispanic Black              | 1.24 (1.19, 1.30)    |                |
| Hispanic                        | 1.49 (1.34, 1.67)    |                |
| Asian                           | 1.73 (1.53, 1.94)    |                |
| Other                           | 1.37 (1.23, 1.53)    |                |
| Unknown                         | 1.19 (0.95, 1.51)    |                |
| <b>Medicare spending by HRR</b> |                      |                |
| Low                             | Ref                  | <0.0001        |
| Medium                          | 1.11 (1.07, 1.15)    |                |
| High                            | 1.37 (1.32, 1.43)    |                |
| <b>Charlson index</b>           |                      |                |
| 0                               | Ref                  | <0.0001        |
| 1                               | 4.02 (3.54, 4.55)    |                |
| 2                               | 7.67 (6.79, 8.66)    |                |
| 3                               | 11.87 (10.53, 13.39) |                |
| 4                               | 17.24 (15.29, 10.45) |                |
| 5 or more                       | 28.65 (25.44, 32.27) |                |
| <b>Dual Eligibility Status</b>  |                      |                |
| No                              | Ref                  | <0.0001        |
| Yes                             | 0.77 (0.75, 0.79)    |                |

Supplemental table 3: Association between billed ACP and ICU visit in last 30 days

|                                 | <b>OR (95% CI)</b>   | <b>P value</b> |
|---------------------------------|----------------------|----------------|
| <b>ACP</b>                      |                      |                |
| No billed CP                    | Ref                  | <0.0001        |
| Had billed ACP                  | 0.85 (0.79, 0.89)    |                |
| <b>Sex</b>                      |                      |                |
| Male                            | Ref                  | 0.454          |
| Female                          | 1.01 (0.98, 1.04)    |                |
| <b>Age Categories</b>           |                      |                |
| 65-69 years                     | Ref                  | <0.0001        |
| 70-74 years                     | 0.85 (0.80, 0.90)    |                |
| 75-79 years                     | 0.76 (0.71, 0.80)    |                |
| 80-84 years                     | 0.60 (0.57, 0.64)    |                |
| 85-89 years                     | 0.47 (0.45, 0.50)    |                |
| 90-94 years                     | 0.33 (0.31, 0.35)    |                |
| >=95                            | 0.22 (0.20, 0.24)    |                |
| <b>Race/Ethnicity</b>           |                      |                |
| Non-Hispanic White              | Ref                  | <0.0001        |
| Non-Hispanic Black              | 1.29 (1.23, 1.36)    |                |
| Hispanic                        | 1.64 (1.46, 1.84)    |                |
| Asian                           | 2.11 (1.87, 2.38)    |                |
| Other                           | 1.33 (1.19, 1.50)    |                |
| Unknown                         | 1.23 (0.96, 1.58)    |                |
| <b>Medicare spending by HRR</b> |                      |                |
| Low                             | Ref                  | <0.0001        |
| Medium                          | 1.19 (1.14, 1.26)    |                |
| High                            | 1.50 (1.43, 1.58)    |                |
| <b>Charlson index</b>           |                      |                |
| 0                               | Ref                  | <0.0001        |
| 1                               | 3.35 (2.74, 4.10)    |                |
| 2                               | 5.29 (4.36, 6.42)    |                |
| 3                               | 7.48 (6.18, 9.06)    |                |
| 4                               | 9.87 (8.16, 11.95)   |                |
| 5 or more                       | 12.90 (10.68, 15.59) |                |
| <b>Dual Eligibility Status</b>  |                      |                |
| No                              | Ref                  | <0.0001        |
| Yes                             | 0.88 (0.85, 0.91)    |                |

Supplemental table 4: Association between billed ACP and late hospice use

|                                 | <b>OR (95% CI)</b> | <b>P value</b> |
|---------------------------------|--------------------|----------------|
| <b>ACP</b>                      |                    |                |
| No billed CP                    | Ref                | 0.183          |
| Had billed ACP                  | 0.96 (0.90, 1.11)  |                |
| <b>Sex</b>                      |                    |                |
| Male                            | Ref                | 0.007          |
| Female                          | 1.04 (1.01, 1.08)  |                |
| <b>Age Categories</b>           |                    |                |
| 65-69 years                     | Ref                | <0.0001        |
| 70-74 years                     | 1.07 (0.99, 1.16)  |                |
| 75-79 years                     | 1.20 (1.12, 1.29)  |                |
| 80-84 years                     | 1.29 (1.20, 1.38)  |                |
| 85-89 years                     | 1.39 (1.30, 1.50)  |                |
| 90-94 years                     | 1.44 (1.34, 1.55)  |                |
| >=95                            | 1.49 (1.38, 1.63)  |                |
| <b>Race/Ethnicity</b>           |                    |                |
| Non-Hispanic White              | Ref                | <0.0001        |
| Non-Hispanic Black              | 0.69 (0.65, 0.73)  |                |
| Hispanic                        | 0.85 (0.75, 0.98)  |                |
| Asian                           | 0.59 (0.51, 0.71)  |                |
| Other                           | 0.79 (0.69, 0.92)  |                |
| Unknown                         | 1.09 (0.83, 1.45)  |                |
| <b>Medicare spending by HRR</b> |                    |                |
| Low                             | Ref                | <0.0001        |
| Medium                          | 1.14 (1.09, 1.20)  |                |
| High                            | 1.22 (1.16, 1.28)  |                |
| <b>Charlson index</b>           |                    |                |
| 0                               | Ref                | <0.0001        |
| 1                               | 3.57 (3.04, 4.19)  |                |
| 2                               | 4.33 (3.70, 5.06)  |                |
| 3                               | 5.00 (4.28, 5.84)  |                |
| 4                               | 5.39 (4.62, 6.29)  |                |
| 5 or more                       | 6.02 (5.17, 7.01)  |                |
| <b>Dual Eligibility Status</b>  |                    |                |
| No                              | Ref                | <0.0001        |
| Yes                             | 0.88 (0.85, 0.92)  |                |

Supplemental table 5: Association between billed ACP and expenditures in last 30 days

|                                 | <b>Coefficient (95% CI)</b>      | <b>P value</b> |
|---------------------------------|----------------------------------|----------------|
| ACP                             |                                  | 0.0470         |
| No billed CP                    | Ref                              |                |
| Had billed ACP                  | 473.74 (6.18, 941.30)            |                |
| <b>Sex</b>                      |                                  | 0.0002         |
| Male                            | Ref                              |                |
| Female                          | -351.93 (-529.26, -174.60)       |                |
| <b>Age Categories</b>           |                                  | <.0001         |
| 65-69 years                     | Ref                              |                |
| 70-74 years                     | -1989.17 (-2,561.97, -1416.38)   |                |
| 75-79 years                     | -3,144.94 (-3,697.99, -2,591.90) |                |
| 80-84 years                     | -5,879.86 (-6,416.73, -5,343.00) |                |
| 85-89 years                     | -7,520.94 (-8,048.89, -6,992.99) |                |
| 90-94 years                     | -8829.08 (-9,374.90, -8,283.27)  |                |
| >=95                            | -9,688.16 (-10314.00, -9061.82)  |                |
| <b>Race/Ethnicity</b>           |                                  | <.0001         |
| Non-Hispanic White              | Ref                              |                |
| Non-Hispanic Black              | 2,926.99 (2600.06,3253.93)       |                |
| Hispanic                        | 5,378.02 (4621.67,6134.37)       |                |
| Asian                           | 9085.51 (8329.11,9841.91)        |                |
| Other                           | 3670.77 (2967.05,4374.49)        |                |
| Unknown                         | 3102.16 (1712.25,4492.06)        |                |
| <b>Medicare spending by HRR</b> |                                  | <.0001         |
| Low                             | Ref                              |                |
| Medium                          | -282.97 (-519.91, -46.0358)      |                |
| High                            | 1918.97 (1654.28,2183.65)        |                |
| <b>Charlson index</b>           |                                  | <.0001         |
| 0                               | Ref                              |                |
| 1                               | 2,763.81 (1,750.83, 3776.78)     |                |
| 2                               | 5,218.08 (4,243.22, 6,192.93)    |                |
| 3                               | 7,294.72 (6,326.63, 8,262.81)    |                |
| 4                               | 9,558.73 (8,588.83, 10,529)      |                |
| 5 or more                       | 13,269 (12,321, 14,217)          |                |
| <b>Dual Eligibility Status</b>  |                                  | <.0001         |
| No                              | Ref                              |                |
| Yes                             | -1,809.34 (-2,093.01, -1,525.68) |                |

Supplemental table 6: Association between billed ACP and ED use in last 30 days

|                                 | <b>95% CI</b>        | <b>P value</b> |
|---------------------------------|----------------------|----------------|
| <b>ACP</b>                      |                      |                |
| No billed CP                    | Ref                  | <0.0001        |
| Had billed ACP                  | 0.81 (0.77, 0.85)    |                |
| <b>Sex</b>                      |                      |                |
| Male                            | Ref                  | 0.160          |
| Female                          | 1.10 (0.99, 1.05)    |                |
| <b>Age Categories</b>           |                      |                |
| 65-69 years                     | Ref                  | <0.0001        |
| 70-74 years                     | 0.88 (0.83, 0.94)    |                |
| 75-79 years                     | 0.86 (0.81, 0.91)    |                |
| 80-84 years                     | 0.82 (0.77, 0.87)    |                |
| 85-89 years                     | 0.74 (0.71, 0.78)    |                |
| 90-94 years                     | 0.68 (0.64, 0.72)    |                |
| >=95                            | 0.59 (0.55, 0.63)    |                |
| <b>Race/Ethnicity</b>           |                      |                |
| Non-Hispanic White              | Ref                  | <0.0001        |
| Non-Hispanic Black              | 1.33 (1.27, 1.39)    |                |
| Hispanic                        | 1.44 (1.29, 1.61)    |                |
| Asian                           | 1.52 (1.35, 1.70)    |                |
| Other                           | 1.16 (1.05, 1.29)    |                |
| Unknown                         | 1.01 (0.86, 1.35)    |                |
| <b>Medicare spending by HRR</b> |                      |                |
| Low                             | Ref                  | <0.0001        |
| Medium                          | 1.06 (1.02, 1.09)    |                |
| High                            | 1.23 (1.18, 1.29)    |                |
| <b>Charlson index</b>           |                      |                |
| 0                               | Ref                  | <0.0001        |
| 1                               | 2.56 (2.34, 2.81)    |                |
| 2                               | 4.23 (3.87, 4.63)    |                |
| 3                               | 5.97 (5.47, 6.53)    |                |
| 4                               | 8.43 (7.71, 9.21)    |                |
| 5 or more                       | 12.76 (11.70, 13.92) |                |
| <b>Dual Eligibility Status</b>  |                      |                |
| No                              |                      | <0.0001        |
| Yes                             | 0.81 (0.79, 0.84)    |                |

Supplemental table 7: Adjusted associations between ACP and Expenditures by setting and HRR regions

|                                                                                               | Adjusted estimates among those who had ACP vs. those who did not have ACP |                     |         |
|-----------------------------------------------------------------------------------------------|---------------------------------------------------------------------------|---------------------|---------|
|                                                                                               | Coefficient                                                               | CI                  | p       |
| <b>Total mean expenditures in all settings by HRR Regions</b>                                 |                                                                           |                     |         |
| Low-intensity Regions                                                                         | -\$1416.6                                                                 | -\$2274.8, -\$558.3 | <0.008  |
| High-intensity Regions                                                                        | \$1600.5                                                                  | \$,945.9, \$2255.2  | <0.0001 |
| <b>Mean expenditures categorized by the setting and the HRR expenditure intensity regions</b> |                                                                           |                     |         |
| <b>All Regions:</b>                                                                           |                                                                           |                     |         |
| Hospice                                                                                       | 311.17                                                                    | 262.70 359.65       | <0.0001 |
| Inpatient                                                                                     | -934.46                                                                   | -1252.60, -616.32   | <0.0001 |
| Outpatient                                                                                    | -123.75                                                                   | -157.64, -89.8516   | <0.0001 |
| SNF                                                                                           | 25.81                                                                     | -38.4583, 90.0894   | 0.431   |
| <b>Low-intensity Regions:</b>                                                                 |                                                                           |                     |         |
| Hospice                                                                                       | 424.4                                                                     | 305.76 543.33       | <0.0001 |
| Inpatient                                                                                     | -2,059.00                                                                 | -2869.83, -1248.16  | <0.0001 |
| Outpatient                                                                                    | -259.45                                                                   | -358.85, -160.05    | <0.0001 |
| SNF                                                                                           | -178.86                                                                   | -385.52 27.7947     | 0.089   |
| <b>Medium-intensity Regions</b>                                                               |                                                                           |                     |         |
| Hospice                                                                                       | 323.77                                                                    | 259.23 388.30       | <0.0001 |
| Inpatient                                                                                     | -1,076.99                                                                 | -1,507.94, -649.07  | <0.0001 |
| Outpatient                                                                                    | -117.37                                                                   | -165.40 -69.3462    | <0.0001 |
| SNF                                                                                           | 32.42                                                                     | -50.1087 114.95     | 0.441   |
| <b>High-intensity Regions</b>                                                                 |                                                                           |                     |         |
| Hospice                                                                                       | 232.48                                                                    | 140.23 324.72       | <0.0001 |
| Inpatient                                                                                     | -199.77                                                                   | -779.85, 380.31     | 0.4997  |
| Outpatient                                                                                    | -73.43                                                                    | -124.97, -21.9063   | 0.005   |
| SNF                                                                                           | 106.53                                                                    | -5.1258, 218.19     | 0.061   |
